# Supplementary material for: Effects of Host, Sample, and in vitro Culture on Genomic Diversity of Pathogenic Mycobacteria
Source: Front Genet. 2019 Jun 4;10:477. doi: 10.3389/fgene.2019.00477 (PMC6558051; doi:10.3389/fgene.2019.00477)
Supplement: Supplementary file 1 [file Table_1.xlsx]

## Sheet: M.tb Regions Removed
4154	4214
4553	4642
7246	7339
10881	10966
11108	11185
17865	17972
18025	18077
21859	21921
22454	22495
23168	23278
24686	24741
32335	32390
33572	33804
36215	36277
53525	53589
55524	55565
55640	55705
79495	79567
80175	80555
84622	84703
95259	95328
103688	105225
105314	106725
112318	112388
131372	132882
142555	142635
149523	151006
154068	154243
161054	161104
163655	163714
167964	168053
177230	177288
177533	180906
185874	185953
187423	188849
188921	190449
194944	194999
206807	206855
206864	206912
207922	208017
210664	210733
215931	215988
222792	222883
234453	234489
242264	242315
243516	243571
249237	249307
253412	253463
260351	260407
261971	262094
267591	267648
271297	271350
272850	272960
279528	279598
307867	309557
309891	310111
327549	327601
332797	332874
333427	336384
336550	339148
339354	340984
344015	344071
349614	351486
353796	353853
361324	363119
366140	372774
372810	375721
379626	379674
382034	382320
382638	382705
399525	400060
400142	401713
410224	410306
421182	421250
423325	423377
424006	424153
424259	424704
424767	434689
467449	468011
472702	472759
472771	474116
475800	476194
484274	484318
488730	488777
490194	490250
498220	498292
507871	507947
514323	514382
530741	532224
543164	544740
547483	547522
554164	554232
569811	569988
577276	577506
580200	580267
580567	580837
587449	587507
595338	595378
595388	595449
606501	608072
611944	611994
616823	616883
621354	641400
642749	642816
645201	645267
671986	675926
678392	678481
681570	681624
686593	686660
690544	690607
698082	698145
701242	701374
701396	702769
703514	703581
703907	703990
706785	706868
707923	707983
708386	708450
709420	709553
709580	709668
710248	710320
710348	710422
711619	711707
714406	714477
715452	715511
721083	721155
725545	725642
725971	726023
731600	731678
733885	733937
736228	736273
742596	742639
745321	745381
748930	749021
754128	754208
755258	755322
791755	791811
795462	795523
802424	802482
812830	812980
822548	822608
832035	832366
832524	832858
832971	833518
835150	835164
835691	838062
838441	840866
841490	841566
842010	842341
846149	847923
848093	850050
850332	850537
850631	850721
863150	863260
863625	863666
867252	867313
885603	885669
888947	891492
898219	898322
908171	909356
912083	912139
915545	915596
917568	917740
921565	921903
923800	923885
924100	924196
924941	927620
927827	930495
947302	947654
950010	950080
960157	960338
961382	961438
964575	965049
966558	966620
968414	970254
971856	971911
976862	978213
993355	993460
995579	995650
1004771	1004822
1010775	1010827
1020048	1021653
1025314	1025398
1025453	1025477
1025487	1026826
1026874	1026898
1027056	1027081
1027094	1029365
1043368	1043419
1049817	1049874
1056807	1056877
1064045	1064108
1082311	1082375
1085274	1085336
1090363	1093154
1093351	1094602
1095068	1096702
1108773	1108833
1112913	1112958
1121656	1121732
1135370	1135433
1142279	1142400
1145250	1145302
1146444	1146524
1150190	1150246
1158908	1159317
1159365	1160071
1160085	1160443
1160529	1161177
1161287	1162482
1162539	1163386
1164562	1165559
1169287	1170743
1171795	1171872
1176918	1177383
1179340	1179400
1179545	1179633
1188411	1190434
1190747	1192158
1195719	1195773
1203486	1203549
1211550	1213873
1214503	1215141
1216459	1219040
1236930	1236988
1240520	1240578
1251607	1252982
1256506	1256572
1262262	1264138
1275919	1276025
1276283	1277807
1277833	1278830
1282832	1282893
1283452	1283655
1284355	1284431
1287965	1288019
1296263	1296315
1297712	1297785
1298754	1300134
1301745	1302691
1305485	1305671
1318254	1318305
1330540	1330591
1338993	1339312
1339339	1342740
1351216	1351284
1353148	1353208
1353242	1353333
1357075	1357127
1357170	1357254
1357283	1357635
1357929	1358003
1367316	1367379
1369247	1369302
1369610	1369670
1383874	1383933
1384979	1386687
1410877	1410952
1418863	1418932
1420193	1420262
1421128	1421181
1421891	1421949
1425283	1425335
1428005	1428088
1434753	1434809
1441417	1441550
1441576	1441702
1443728	1443780
1446182	1446273
1451769	1452005
1456580	1456632
1457448	1457562
1461088	1461145
1461955	1462014
1468138	1469626
1469628	1469656
1472713	1472961
1473022	1473257
1474157	1474274
1474436	1474618
1475761	1476033
1476107	1476522
1479770	1479831
1481384	1481432
1481444	1481504
1483103	1483150
1483213	1483265
1488144	1489975
1507526	1507586
1508673	1508728
1525560	1525616
1532433	1533663
1535288	1535336
1536126	1536182
1541939	1543328
1548976	1549022
1553244	1553318
1559385	1559448
1561454	1563398
1572117	1573867
1578616	1578703
1584142	1584204
1588812	1588865
1595912	1595966
1606376	1607982
1611868	1611912
1612553	1612667
1618199	1619694
1625361	1625423
1630628	1634800
1635994	1638402
1644243	1644375
1649393	1649480
1655599	1656731
1658572	1658665
1678953	1679018
1679052	1679102
1681860	1681922
1683757	1683812
1685479	1685546
1702401	1702448
1702469	1702516
1702667	1702853
1708592	1708658
1724527	1724577
1725801	1725849
1751287	1753343
1776751	1776830
1777604	1777671
1779184	1779734
1779799	1782594
1782613	1783238
1783299	1784311
1784487	1786538
1786574	1789875
1800175	1800228
1809654	1809759
1810323	1810370
1814843	1815138
1821850	1821933
1830069	1830130
1831729	1831818
1849453	1849541
1855754	1856706
1858834	1858888
1859876	1859936
1862337	1865392
1867241	1867318
1868407	1868455
1869201	1869258
1870485	1870589
1871815	1871870
1876454	1876469
1876570	1876635
1882571	1882617
1883749	1883790
1889452	1889481
1895343	1895603
1900022	1900100
1902728	1902778
1907454	1907580
1918531	1918585
1923414	1923470
1926192	1927147
1927201	1928594
1931487	1932664
1932684	1933888
1938088	1938150
1944751	1944813
1946608	1946701
1946839	1947033
1955662	1955677
1958367	1958428
1969339	1969408
1970094	1970143
1981604	1984785
1987689	1989069
1989823	1992587
1994964	1995032
1996089	1998622
1999132	1999367
1999795	1999818
2000604	2002480
2004918	2004976
2014109	2014161
2016296	2016362
2017877	2017938
2025291	2026408
2026467	2027981
2028415	2029487
2029894	2030213
2030322	2030993
2039443	2041430
2041991	2043282
2043374	2044785
2044913	2046852
2048062	2048381
2048388	2049607
2049911	2051160
2051272	2052698
2052700	2052789
2059424	2059605
2061168	2062684
2074426	2074643
2087961	2089528
2094907	2094922
2101328	2101392
2108587	2108665
2122554	2122610
2124851	2124898
2136995	2137048
2152758	2152836
2153712	2153746
2155718	2155774
2156801	2156869
2157480	2157549
2162922	2167321
2167639	2170622
2186009	2186068
2187106	2187155
2195847	2197370
2198718	2198819
2204586	2204694
2206523	2206574
2211306	2211371
2226234	2227930
2237389	2237442
2242369	2242422
2244105	2244158
2244624	2244691
2254188	2254243
2260655	2261698
2262000	2263179
2266507	2266517
2270877	2270928
2289864	2289909
2291348	2291418
2292286	2292363
2295160	2296432
2296964	2297034
2299187	2300832
2300897	2300984
2301250	2302522
2303051	2303120
2305256	2306899
2309562	2309640
2315203	2315270
2318466	2318551
2321642	2321693
2324325	2324376
2330142	2330230
2337797	2337863
2337927	2338104
2339366	2339430
2339444	2339508
2340116	2340252
2340520	2340697
2341363	2341425
2343017	2343926
2343984	2344234
2345421	2345490
2347230	2347298
2347385	2347623
2350382	2350430
2353918	2353972
2356719	2358216
2358379	2360051
2365394	2366781
2367349	2367665
2367701	2368452
2372430	2372554
2381061	2382502
2387192	2387982
2401812	2401880
2404876	2404938
2407507	2407548
2412567	2412616
2412945	2413001
2419690	2419776
2421412	2421468
2421695	2421762
2423230	2424848
2427954	2428013
2430104	2431484
2439130	2439958
2445687	2445745
2458387	2458454
2461310	2461514
2462549	2462623
2468266	2468328
2471703	2471771
2476267	2476321
2482559	2482660
2482819	2482904
2484934	2485012
2493796	2493823
2494047	2494116
2498273	2498340
2512061	2512121
2517089	2517151
2521728	2521776
2522099	2522153
2522168	2522235
2523179	2523242
2528654	2528710
2531883	2532219
2536672	2536727
2537212	2537270
2549994	2551380
2581753	2582308
2583425	2583789
2597855	2597898
2598756	2598818
2600721	2601889
2617657	2618918
2619400	2619487
2622065	2622148
2622780	2622843
2624357	2624427
2625868	2626693
2632913	2634108
2634518	2637034
2637248	2637543
2637678	2639618
2651743	2651948
2664274	2664368
2672054	2672134
2674204	2674275
2681308	2681351
2686476	2686524
2687123	2687262
2690666	2690739
2692789	2693894
2706007	2706746
2708313	2708367
2716310	2716396
2720625	2721787
2721839	2721861
2727326	2727930
2727957	2728276
2738102	2738161
2744460	2744521
2744529	2744610
2753317	2753403
2760389	2760475
2762757	2763066
2763392	2763701
2779812	2779942
2780739	2780788
2784591	2785987
2794168	2794256
2795291	2797395
2797856	2797917
2798635	2798738
2800666	2800923
2801244	2806246
2806363	2806630
2815022	2815063
2824615	2824667
2827847	2827955
2828484	2829940
2835491	2835568
2835775	2837273
2837402	2837471
2842038	2842151
2844099	2844152
2850923	2850974
2866496	2866573
2866581	2866759
2866917	2866996
2867032	2867099
2867154	2867234
2867236	2867406
2867456	2867485
2867505	2867664
2867688	2867765
2873069	2873124
2880988	2881048
2887933	2887982
2905135	2905221
2915149	2915214
2921541	2923192
2935036	2936798
2943590	2945236
2953453	2953502
2960095	2962451
2969498	2969572
2969750	2969827
2969936	2970017
2970541	2971559
2971649	2972037
2972095	2973475
2973785	2976564
2976576	2976919
2976979	2980828
2982934	2983884
2990579	2990703
2995994	2996178
3007028	3007230
3013607	3013692
3022125	3022199
3038448	3038517
3041651	3041715
3053904	3055501
3072037	3072100
3073050	3073118
3076884	3078088
3078148	3078995
3079299	3080467
3082456	3082664
3100169	3102172
3104974	3105042
3105553	3105611
3107355	3107404
3113032	3113092
3113699	3113776
3113790	3113850
3115731	3116152
3116713	3116741
3116808	3118237
3119178	3123581
3129945	3130081
3132882	3133465
3135778	3136361
3137381	3137453
3142822	3142887
3155869	3156099
3156294	3156405
3159422	3159492
3160517	3160588
3162258	3164125
3171458	3171637
3173805	3173834
3181789	3181841
3181847	3181902
3189478	3189524
3189533	3189559
3189560	3189591
3192185	3192365
3194128	3196442
3200784	3202030
3203384	3204300
3219058	3219102
3225734	3225838
3232641	3232876
3239465	3239795
3247574	3247642
3247810	3247911
3247923	3248158
3252989	3253055
3253227	3253574
3258327	3258396
3263691	3263777
3266553	3266625
3285770	3285855
3288454	3290516
3291414	3291441
3291452	3291508
3293192	3293238
3313273	3313682
3316409	3316475
3317524	3317749
3318830	3318894
3319463	3319671
3319788	3319843
3320753	3320810
3324329	3324395
3333132	3333190
3333748	3335758
3335782	3335797
3335992	3336036
3336494	3336812
3339306	3339359
3351086	3351218
3353997	3354049
3361693	3361749
3364843	3364889
3370927	3370986
3376917	3378279
3378319	3378460
3379354	3381036
3381302	3382759
3387531	3387588
3392126	3392193
3393617	3393668
3394362	3394418
3415176	3415199
3426042	3426094
3429293	3429356
3430941	3431043
3444275	3444343
3454826	3454903
3456333	3456385
3459654	3459737
3462136	3462191
3462589	3462645
3465768	3467101
3467364	3467477
3473535	3473641
3481315	3482774
3483936	3485121
3489875	3490012
3490466	3491661
3493380	3493445
3501324	3501742
3501784	3502946
3510078	3511327
3521364	3521417
3527381	3529173
3532762	3532827
3535192	3535273
3536560	3536627
3543311	3543386
3551202	3552604
3552695	3554080
3557301	3558355
3559355	3559452
3560027	3560095
3573437	3573509
3579515	3579581
3587740	3587789
3589231	3589361
3590655	3590702
3591488	3591574
3594253	3594468
3598479	3598571
3598716	3598776
3614755	3614823
3617109	3617185
3617921	3618006
3626609	3626671
3630276	3630327
3632992	3633046
3650939	3650989
3653782	3664005
3679071	3679163
3686809	3686868
3690946	3691064
3695686	3695751
3704890	3705009
3710369	3713471
3717556	3717622
3720078	3720213
3729354	3736945
3736974	3742784
3743193	3743610
3743701	3753194
3753321	3755247
3755942	3767112
3769509	3769725
3769749	3769867
3770989	3771096
3774348	3774401
3775671	3775715
3778558	3780344
3781201	3781300
3781956	3782005
3790337	3790391
3795034	3796426
3799982	3800016
3800044	3801473
3801525	3801559
3801643	3803918
3806693	3806750
3807003	3807073
3808835	3808906
3809848	3809934
3810075	3810130
3810457	3810509
3810824	3810905
3810916	3810989
3811202	3811253
3811787	3811841
3820312	3820599
3830720	3830784
3841523	3842813
3842836	3842898
3843026	3843744
3843875	3844650
3844728	3845980
3846451	3848815
3849284	3850149
3851798	3851933
3858351	3858456
3873454	3873518
3877773	3877837
3878577	3878622
3883515	3884931
3890762	3892150
3894083	3895617
3908955	3909002
3909764	3909823
3914556	3914607
3918208	3936720
3937852	3937930
3939607	3944973
3945088	3945607
3945768	3950273
3950820	3951339
3953579	3953638
3955425	3955482
3969333	3970573
3970695	3972463
3978049	3979508
3991563	3991630
3997970	3999648
4006907	4006951
4020196	4020254
4021386	4021458
4026554	4026622
4031394	4033168
4036721	4038060
4042648	4042761
4045224	4045280
4046637	4046698
4052490	4052552
4052944	4053559
4059974	4060601
4060638	4062208
4063123	4063184
4064556	4064612
4070236	4070325
4075610	4075635
4075742	4076109
4076474	4077755
4077787	4077859
4077989	4078211
4078501	4079759
4079781	4079803
4087491	4087625
4088863	4088911
4091027	4091078
4091223	4091527
4093622	4094537
4095859	4095942
4096666	4096719
4118107	4118171
4118868	4118922
4120910	4121058
4134596	4134730
4146550	4146605
4149398	4149471
4149622	4149675
4151038	4151100
4155454	4155588
4156789	4156977
4157003	4157076
4168436	4168490
4168936	4168987
4175865	4175925
4189275	4190242
4190274	4190527
4196161	4196516
4198195	4198607
4198864	4199099
4204922	4204981
4207124	4207178
4215871	4216279
4216861	4216942
4222395	4222458
4227017	4227073
4238008	4238074
4252872	4254342
4266551	4266627
4268843	4268894
4269949	4270012
4274489	4274560
4276561	4278095
4279321	4279378
4280060	4280139
4283411	4283467
4287745	4287808
4301533	4303407
4311220	4311292
4317978	4318023
4318331	4319381
4320039	4320111
4343218	4343275
4346675	4346730
4348716	4348831
4350735	4351054
4351065	4352191
4353189	4353441
4353846	4353912
4359121	4359179
4369594	4369716
4374474	4375693
4375752	4376005
4378078	4378150
4383361	4383438
4390041	4390147
4390341	4390403
4400961	4401025
4408688	4408739

## Sheet: Mb Regions Removed
10887	10960
10887	10960
10887	10960
11112	11184
11112	11184
11112	11184
25625	25707
25625	25707
25625	25707
28918	29187
33566	33778
43546	46455
80272	80586
103748	105251
105360	106751
105360	106751
131420	132910
131420	132910
149571	151187
149571	151187
177733	179499
177733	179499
179509	181086
179509	181086
187623	189029
187623	189029
189121	190629
189121	190629
194334	194513
248311	249102
306202	307872
306202	307872
331762	332004
331762	332004
331827	334433
331827	334433
334697	337330
334697	337330
337580	340075
337580	340075
340366	341976
340366	341976
350626	350934
350626	350934
350937	352478
350937	352478
362336	364156
362336	364156
367197	370640
367197	370640
370784	376741
370784	376741
387234	387304
387234	387304
387234	387304
400565	401080
400565	401080
425173	435696
425173	435696
467689	469020
467689	469020
531770	533209
531770	533209
544193	545749
544193	545749
601592	602998
623943	625688
623943	625688
625594	625821
625594	625821
659352	659432
659352	659432
659352	659432
673239	677159
673239	677159
702629	704012
702651	703259
703261	704004
722975	723679
732730	732802
732730	732802
732730	732802
732839	732912
732839	732912
732839	732912
734760	734832
734760	734832
734760	734832
834176	834692
834358	834672
834814	835332
834814	835332
837525	839918
837525	839918
840317	843046
840317	843046
848349	850103
848349	850103
850293	852230
850293	852230
852532	852717
852832	852903
852832	852903
852832	852903
891218	892312
891218	892309
922405	922695
922405	922692
924633	924705
924633	924705
924633	924705
924829	924902
924829	924902
924829	924902
924940	925013
924940	925013
924940	925013
925043	925116
925043	925116
925043	925116
925781	926194
925781	926194
926191	928512
926191	928512
928739	931234
928739	931234
948066	948396
948067	948399
968884	970710
968884	970710
977352	978668
977352	978668
979827	980693
1020524	1021795
1020524	1021795
1021810	1022109
1021810	1022109
1025787	1025859
1025787	1025859
1025787	1025859
1025924	1027359
1025924	1025938
1025963	1027282
1027345	1027359
1027507	1029829
1027507	1027555
1027526	1027542
1027570	1028151
1028151	1029803
1029782	1029829
1029811	1029827
1090812	1093583
1090812	1093583
1093800	1094807
1093800	1094807
1095529	1096902
1095529	1096902
1113962	1114034
1113962	1114034
1113962	1114034
1125895	1127454
1133785	1134360
1138523	1138594
1138523	1138594
1138523	1138594
1159365	1159754
1159368	1160880
1159822	1160508
1160542	1160880
1161744	1162919
1161744	1162919
1162996	1163823
1162996	1163823
1165019	1165997
1165019	1165570
1165539	1165946
1169747	1171181
1169820	1169834
1169872	1171119
1171129	1171143
1177376	1177690
1177844	1177917
1177844	1177917
1177844	1177917
1188869	1190884
1188869	1190884
1191217	1193508
1191217	1193508
1212920	1215244
1212920	1215244
1215894	1216328
1215894	1216328
1216207	1216512
1216207	1216512
1217850	1220402
1217850	1220402
1252988	1254343
1263643	1265499
1263643	1265499
1277672	1279120
1279215	1280192
1279215	1279218
1279219	1279235
1279265	1279672
1279641	1280189
1280173	1280188
1280189	1280192
1300139	1300681
1300139	1300681
1300635	1301177
1300635	1301177
1301195	1301497
1301195	1301497
1303128	1304054
1303128	1304054
1340253	1340552
1340253	1340552
1340599	1341771
1340599	1341771
1342535	1342542
1342543	1343977
1342581	1342595
1342605	1343852
1343890	1343904
1343978	1343985
1358493	1358867
1358493	1358867
1386233	1387921
1386233	1387921
1444242	1444314
1444242	1444314
1444242	1444314
1444428	1446080
1466189	1467688
1466189	1466208
1467669	1467688
1469882	1471418
1469882	1471418
1469882	1471418
1471694	1474831
1471694	1474831
1471694	1474831
1474935	1475049
1474935	1475049
1474935	1475049
1486189	1488000
1486189	1488000
1510763	1510846
1510763	1510846
1510763	1510846
1530478	1531668
1530478	1531668
1558143	1558451
1558143	1558451
1558448	1560067
1558448	1560067
1568806	1570164
1568806	1570164
1578473	1579411
1579408	1580781
1602693	1604279
1602693	1604279
1614537	1616012
1614537	1616012
1626985	1631211
1626985	1631211
1632588	1634975
1632588	1634975
1652355	1653467
1652355	1653467
1720532	1723657
1735310	1737346
1735310	1737346
1764680	1765090
1765296	1765607
1765712	1766065
1766009	1767430
1767438	1767950
1768124	1768594
1768675	1768989
1768986	1769258
1769272	1769667
1769863	1771278
1771278	1771676
1771673	1771894
1771950	1772465
1772462	1773871
1773873	1775235
1813381	1813454
1813381	1813454
1813381	1813454
1833883	1837401
1838971	1839753
1841129	1842061
1841129	1842061
1844098	1845123
1845123	1847618
1847712	1850768
1847712	1850768
1898942	1900216
1903282	1904088
1912553	1913931
1916838	1917995
1916838	1917995
1918035	1919219
1918035	1919219
1931953	1932026
1931953	1932026
1931953	1932026
1932189	1932363
1967012	1970167
1967012	1970167
1989024	1990253
1989024	1989037
1989582	1989797
1990240	1990253
1991054	1992928
1991054	1992928
2015759	2016853
2015759	2016853
2016932	2017231
2016932	2017231
2017245	2018426
2017245	2018426
2018880	2019932
2018880	2019932
2020359	2020658
2020359	2020658
2029908	2031875
2029908	2031875
2032456	2033727
2032456	2033727
2033839	2035230
2033839	2035230
2035378	2037000
2035378	2037000
2037034	2037297
2037034	2037297
2038527	2038826
2038527	2038826
2038853	2040052
2038853	2040052
2040376	2041605
2040376	2041605
2041737	2042300
2041737	2042300
2042301	2043149
2042301	2043149
2051633	2053138
2051633	2053138
2078323	2079723
2078323	2079723
2134686	2135117
2153213	2158945
2153213	2158945
2159283	2160287
2159283	2160287
2160370	2162247
2160370	2162247
2187623	2188984
2205160	2206836
2205160	2206836
2210596	2211135
2239359	2240586
2239440	2240060
2240014	2240604
2324842	2326310
2338572	2340047
2338572	2340047
2347842	2348138
2347842	2348138
2348194	2348925
2348194	2348925
2361496	2362890
2361496	2362890
2367600	2368667
2367600	2368667
2371613	2372857
2382501	2382586
2382501	2382586
2382501	2382586
2403758	2405230
2403758	2405230
2408627	2409661
2418179	2418982
2418316	2418981
2489746	2489817
2489746	2489817
2489746	2489817
2559359	2559432
2559359	2559432
2559359	2559432
2578326	2579474
2578326	2579474
2595264	2596505
2595264	2596505
2597004	2597076
2597004	2597076
2597004	2597076
2603651	2605024
2603651	2605024
2605762	2607606
2605762	2607606
2607744	2609135
2619824	2620009
2619824	2620009
2660871	2661953
2660871	2661953
2674201	2674920
2674201	2674920
2688829	2690039
2688829	2688841
2688961	2689653
2689667	2689960
2690027	2690039
2695499	2696083
2695499	2696083
2696130	2696429
2696130	2696429
2715758	2718388
2733494	2733567
2733494	2733567
2733494	2733567
2733704	2733774
2733704	2733774
2733704	2733774
2760978	2761051
2760978	2761051
2760978	2761051
2762102	2762926
2762102	2762926
2762605	2763777
2762605	2763777
2763566	2764186
2763566	2764186
2768055	2771507
2768055	2771507
2771504	2773033
2771504	2773033
2794651	2794723
2794651	2794723
2794651	2794723
2795291	2796725
2795329	2795343
2795353	2796600
2796638	2796652
2802291	2802363
2802291	2802363
2802291	2802363
2802582	2804060
2802582	2804060
2840710	2841222
2841223	2843937
2863416	2865251
2872269	2873540
2888999	2890639
2888999	2890639
2892274	2892840
2902503	2904245
2902503	2904245
2908646	2910724
2911057	2912451
2911057	2912451
2927567	2929903
2927567	2929903
2936959	2937030
2936959	2937030
2936959	2937030
2937215	2937287
2937215	2937287
2937215	2937287
2937317	2937387
2937317	2937387
2937317	2937387
2937404	2937475
2937404	2937475
2937404	2937475
2939425	2940353
2939498	2939512
2939550	2940353
2996461	2997405
3001622	3003160
3010528	3012042
3010528	3012042
3033468	3034652
3033468	3034652
3034732	3035559
3034732	3035559
3035883	3037031
3035883	3037031
3045594	3046910
3056724	3058755
3056751	3058130
3058130	3058711
3058913	3059809
3072293	3072694
3072296	3072694
3073369	3074775
3073370	3074050
3073980	3074777
3075735	3080138
3075735	3075770
3075806	3075841
3075879	3075914
3075953	3075988
3076032	3076067
3076109	3076144
3076183	3076218
3076257	3076292
3076330	3076365
3076404	3076439
3076475	3076510
3076548	3076583
3076621	3076656
3076693	3076728
3076765	3076800
3076839	3076874
3076913	3076948
3076984	3077003
3077001	3077003
3077004	3078358
3077004	3077031
3077046	3077882
3077981	3078307
3078331	3078358
3078359	3078361
3078362	3078377
3078418	3078453
3078493	3078528
3078566	3078601
3078642	3078677
3078719	3078754
3078791	3078826
3078863	3078898
3078936	3078971
3078997	3079032
3079074	3079109
3079146	3079181
3079221	3079256
3079295	3079330
3079369	3079404
3079440	3079475
3079515	3079550
3079589	3079624
3079664	3079699
3079736	3079771
3079807	3079842
3079880	3079915
3079952	3079987
3080029	3080064
3080103	3080138
3097058	3097885
3107772	3109520
3118784	3120631
3118784	3120631
3146099	3147193
3150681	3152948
3150745	3152064
3152061	3152948
3157310	3158536
3157310	3158536
3172181	3172873
3172877	3173407
3244934	3244938
3244939	3247151
3244939	3244992
3245037	3246278
3246278	3246808
3247098	3247151
3247152	3247156
3269972	3270361
3290455	3292479
3290455	3290460
3290472	3291851
3291851	3292435
3292474	3292479
3305107	3305179
3305107	3305179
3305107	3305179
3305219	3305290
3305219	3305290
3305219	3305290
3305365	3306837
3323879	3325408
3326565	3328049
3328046	3328345
3333554	3334867
3333554	3334867
3334888	3334974
3335595	3335888
3335935	3337242
3335935	3337242
3337239	3337553
3337239	3337553
3337865	3337872
3337873	3339307
3337911	3337925
3337935	3339182
3339220	3339234
3339308	3339315
3339345	3340448
3388387	3388459
3388387	3388459
3388387	3388459
3422325	3423638
3422325	3423638
3437865	3437872
3437873	3439307
3437946	3437960
3437998	3439245
3439255	3439269
3439308	3439315
3444248	3445423
3444248	3445423
3455106	3456251
3455106	3456251
3456903	3458045
3456903	3458045
3465197	3466426
3465197	3466426
3482500	3484269
3482500	3484269
3484517	3486415
3484517	3486415
3511796	3513185
3511796	3511858
3511845	3512879
3513123	3513185
3513905	3513978
3513905	3513978
3513905	3513978
3668986	3670071
3668998	3670710
3679870	3680880
3686614	3690630
3686614	3690630
3690679	3694692
3690679	3694692
3694689	3696308
3694689	3696308
3697245	3700430
3697245	3700430
3700427	3706717
3700427	3706717
3706864	3707893
3707297	3707788
3707825	3708565
3707825	3708565
3709479	3713138
3709479	3713138
3713132	3719266
3713132	3719266
3719324	3720628
3719324	3720628
3731263	3731727
3732094	3733974
3732094	3733974
3752268	3752269
3752270	3753837
3752270	3752294
3752375	3753079
3753069	3753746
3753813	3753837
3753838	3753839
3753936	3756185
3753936	3756185
3794867	3795403
3794867	3795403
3795344	3796507
3795344	3796507
3796996	3797841
3796998	3797842
3823752	3824645
3831221	3832613
3840431	3840727
3840431	3840727
3840764	3841945
3840764	3841945
3872192	3876274
3872192	3876274
3876565	3880947
3876565	3880947
3883854	3889670
3883854	3889670
3890501	3893479
3890501	3893479
3912558	3913778
3912558	3913778
3913920	3915668
3913920	3915668
3921274	3922713
3921274	3922713
3941195	3942853
3941195	3942853
3964401	3965609
3965610	3967019
3974619	3976373
3974619	3976373
3979813	3981291
3979813	3981291
3984664	3986181
4012903	4015020
4012903	4012951
4012989	4013336
4013721	4014221
4014221	4014967
4014972	4015020
4015743	4017035
4015743	4015755
4015757	4016986
4017023	4017035
4018602	4018674
4018602	4018674
4018602	4018674
4028470	4028754
4028470	4028754
4030869	4031183
4030869	4031183
4031177	4031890
4031177	4031890
4063888	4063961
4063888	4063961
4063888	4063961
4105805	4105890
4105805	4105890
4105805	4105890
4126745	4127101
4126745	4127101
4132465	4132800
4132465	4132800
4135168	4135383
4135425	4135511
4135425	4135511
4135425	4135511
4153159	4153231
4153159	4153231
4153159	4153231
4153262	4153350
4153262	4153350
4153262	4153350
4155980	4157227
4158876	4158962
4158876	4158962
4158876	4158962
4189149	4190642
4189149	4189175
4189288	4189905
4189880	4190611
4190616	4190642
4212844	4214358
4212844	4214358
4237816	4239688
4237836	4239062
4239059	4239670
4243928	4245187
4254615	4255644
4255048	4255539
4287065	4287361
4287065	4287361
4287395	4288501
4287395	4288501
4308441	4309640
4308441	4309640
4309719	4309952
4309719	4309952
4341488	4342162
