# Supplementary material for: Effects of Host, Sample, and in vitro Culture on Genomic Diversity of Pathogenic Mycobacteria
Source: Front Genet. 2019 Jun 4;10:477. doi: 10.3389/fgene.2019.00477 (PMC6558051; doi:10.3389/fgene.2019.00477)
Supplement: Supplementary file 2 [file Table_2.xlsx]

## Sheet: snps_typed_freq
Patient	Lineage	Number of lineage specific loci with multiple allele states	Total # of lineage-specific loci	Proportion of lineage-specific loci with multiple allele states
10	lineage2	9	665	0.0135338
10	lineage3	1	590	0.00169492
10	lineage4	5	2843	0.00175871
10	lineage6	1	220	0.00454545
10	lineage7	2	898	0.00222717
11	lineage1	6	1113	0.00539084
11	lineage2	23	665	0.0345865
11	lineage3	60	590	0.101695
11	lineage4	164	2843	0.0576855
11	lineage5	1	372	0.00268817
11	lineage6	1	220	0.00454545
11	lineage7	3	898	0.00334076
11	lineageBOVAFRI	1	167	0.00598802
14	lineage1	14	1113	0.0125786
14	lineage2	46	665	0.0691729
14	lineage3	8	590	0.0135593
14	lineage4	165	2843	0.0580373
14	lineage5	4	372	0.0107527
14	lineage7	8	898	0.00890869
14	lineageBOVAFRI	1	167	0.00598802
2	lineage2	1	665	0.00150376
2	lineage4	6	2843	0.00211045
21	lineage1	5	1113	0.00449236
21	lineage2	5	665	0.0075188
21	lineage7	1	898	0.00111359
22	lineage1	20	1113	0.0179695
22	lineage3	1	590	0.00169492
22	lineage4	3	2843	0.00105522
22	lineage5	1	372	0.00268817
22	lineage7	3	898	0.00334076
23	lineage2	1	665	0.00150376
23	lineage3	3	590	0.00508475
23	lineage4	1	2843	0.000351741
23	lineage7	1	898	0.00111359
3	lineage4	1	2843	0.000351741
4	lineage1	1	1113	0.000898473
4	lineage2	22	665	0.0330827
4	lineage4	11	2843	0.00386915
5	lineage2	2	665	0.00300752
5	lineage4	1	2843	0.000351741
5	lineage7	2	898	0.00222717
7	lineage2	2	665	0.00300752
7	lineage4	6	2843	0.00211045
7	lineage7	3	898	0.00334076
7	lineageBOVAFRI	1	167	0.00598802
8	lineage1	1	1113	0.000898473
8	lineage2	21	665	0.0315789
8	lineage4	11	2843	0.00386915
8	lineage7	2	898	0.00222717
9	lineage2	1	665	0.00150376
9	lineage4	1	2843	0.000351741
9	lineage7	2	898	0.00222717
