# Supplementary material for: Effects of Host, Sample, and in vitro Culture on Genomic Diversity of Pathogenic Mycobacteria
Source: Front Genet. 2019 Jun 4;10:477. doi: 10.3389/fgene.2019.00477 (PMC6558051; doi:10.3389/fgene.2019.00477)
Supplement: Supplementary file 3 [file Table_3.xlsx]

## Sheet: Table S2 Coverage Statistics
Sample	Patient	Source	Starting Sequence	Aligned Sequences (%)	Final Sequences (%)	Initial Coverage	Final Coverage
ERR867528	1	culture	9148963	98.7	97.9	190.3	165.2
ERR867519	2	sputum	6646608	94.7	92.5	168.7	140.5
ERR867529	2	culture	5953855	98.6	98	131.1	115.2
ERR867520	3	sputum	5294384	89.5	87.5	128.7	108.5
ERR867530	3	culture	3979300	98.9	98.2	83.2	73.8
ERR867521	4	sputum	5517011	75.2	73.1	109.6	91.4
ERR867531	4	culture	4281752	98	97.4	87	76.6
ERR867522	5	sputum	5230228	60.7	56.9	80.3	64.9
ERR867532	5	culture	3796847	98.6	97.9	78.4	68.7
ERR867523	6	sputum	626100	88.8	79.4	15	12.1
ERR867533	6	culture	4280737	98.8	98	90.8	79.9
ERR867524	7	sputum	5517225	82.9	76.6	121	99.4
ERR867534	7	culture	3807941	98.3	97.7	76.9	68
ERR867525	8	sputum	5737989	76.7	71.1	110.8	90.4
ERR867535	8	culture	4046977	98.7	98.1	83.4	73.5
ERR867526	9	sputum	4605729	83.8	81.1	96.9	80.7
ERR867536	9	culture	3304710	98.7	98.1	69.3	61.4
ERR867527	10	sputum	5980880	85.1	81	133.3	109.8
ERR867537	10	culture	3554521	98.6	98	76	67
ERR867538	11	sputum	8556954	39.9	35.8	81.4	67.6
ERR867546	11	culture	7389662	99.1	97.8	164.2	142.3
ERR867547	12	culture	8538092	98.8	97.7	178	153.5
ERR867548	13	culture	7580863	99.1	97.4	163	139.5
ERR867541	14	sputum	13575009	46.3	38.3	135.4	107.8
ERR867549	14	culture	7381945	98.7	97.7	156.2	135.4
ERR867542	15	sputum	13778926	15.6	11.4	38.8	29.9
ERR867550	15	culture	8763567	99.3	98.1	190.2	164.4
ERR867543	16	sputum	1847742	18.7	16.7	7.5	6.3
ERR867551	16	culture	16341030	85	83.3	317	258.7
ERR867544	17	sputum	5218464	3.2	1.9	2.7	1.7
ERR867552	17	culture	1897822	69.4	67.6	28.9	24.2
ERR867545	18	sputum	5133337	2.4	1.3	1.8	1.1
ERR867553	18	culture	2004349	73.5	72.1	33.4	28
ERR867554	19	sputum	2289017	24.2	17.9	11.2	8.7
ERR867560	19	culture	2934225	63.6	61.6	44.1	37.6
ERR867555	20	sputum	10002308	5.9	4.3	11	8.7
ERR867561	20	culture	2812090	79.9	78.1	54.5	45.9
ERR867556	21	sputum	7552762	87	85.5	155.4	123.4
ERR867562	21	culture	3554297	94.5	92.5	81.1	68.9
ERR867557	22	sputum	8510346	85.1	83.6	169.5	134.7
ERR867563	22	culture	3531961	93.3	91.6	79.1	67.5
ERR867558	23	sputum	7562433	82.5	81	146.1	113.2
ERR867564	23	culture	5744613	91.1	89.5	125.7	104.8
ERR867559	24	sputum	9709567	6.4	5	12.1	10.1
ERR867566	25	sputum	3084512	4.1	0.8	1	0.4
ERR867567	26	sputum	2961547	22.2	11.2	9.9	6.1
ERR867568	27	sputum	1407520	17.9	14.9	5.4	4.2
ERR867569	28	sputum	4142037	22.3	0.4	4	0.2
ERR867570	29	sputum	4555597	32	0.7	7.4	0.4
ERR867571	30	sputum	614931	12.4	0.9	0.9	0.1
ERR867572	31	sputum	418642	43.8	2.6	2.5	0.2
ERR867573	32	sputum	769048	30.6	3.7	2.5	0.5
ERR867574	33	sputum	998353	11.9	1.5	1.4	0.3
ERR867575	34	sputum	1154247	25.4	9.1	4.3	1.8
Mb_WH_01c	35	culture	3477683	99.6	99.2	97.6	85.7
Mb_WH_01s	35	sputum	42506627	32	31.1	217.1	191.4
Mb_WH_02c	35	culture	3736764	99.4	98.9	104.4	97.6
Mb_WH_02s	35	sputum	33145172	1.9	0.9	7.2	5.2
Mb_WH_03c	35	culture	4061325	99.3	98.8	113.4	99.8
Mb_WH_03s	35	sputum	25292925	17.3	16.5	78.9	70.1
Mb_WH_04c	35	culture	5117264	98.6	98	141.6	122
Mb_WH_04s	35	sputum	34599011	17.6	16.6	104.4	92.2
Negative Sputum	NA	sputum	41013676	0.3	0	0.6	0

## Sheet: Lineage Typing
Sample	Patient	Source	Lineage
ERR867519	2	sputum	Lineage 4
ERR867529	2	culture	Lineage 4
ERR867520	3	sputum	Lineage 4
ERR867530	3	culture	Lineage 4
ERR867521	4	sputum	Lineage 2
ERR867531	4	culture	Lineage 2
ERR867522	5	sputum	Lineage 2
ERR867532	5	culture	Lineage 2
ERR867524	7	sputum	Lineage 4
ERR867534	7	culture	Lineage 4
ERR867525	8	sputum	Lineage 2
ERR867535	8	culture	Lineage 2
ERR867526	9	sputum	Lineage 2
ERR867536	9	culture	Lineage 2
ERR867527	10	sputum	Lineage 2
ERR867537	10	culture	Lineage 2
ERR867538	11	sputum	Lineage 4
ERR867546	11	culture	Lineage 4
ERR867541	14	sputum	Lineage 4
ERR867549	14	culture	Lineage 4
ERR867556	21	sputum	Lineage 2
ERR867562	21	culture	Lineage 2
ERR867557	22	sputum	Lineage 1
ERR867563	22	culture	Lineage 1
ERR867558	23	sputum	Lineage 3
ERR867564	23	culture	Lineage 3
