# Supplementary material for: Effects of Host, Sample, and in vitro Culture on Genomic Diversity of Pathogenic Mycobacteria
Source: Front Genet. 2019 Jun 4;10:477. doi: 10.3389/fgene.2019.00477 (PMC6558051; doi:10.3389/fgene.2019.00477)
Supplement: Supplementary file 5 [file Table_5.xlsx]

## Sheet: Intra-hostWindowsOverlapCulture
Window	Frequency
210000	2
220000	2
230000	2
240000	2
3260000	2
3270000	2
3280000	2
3290000	2
3300000	2
3310000	2
3730000	2
3740000	2
3750000	2

## Sheet: Intra-hostWindowsOverlapSputum
Window	Frequency
740000	3
750000	3
760000	3
770000	3
780000	3

## Sheet: Inter-hostWindowsOverlapSputum
Window	Frequency
740000	2
750000	2
760000	2
770000	2
780000	2
790000	2
800000	2
810000	2
1440000	11
1450000	11
1460000	11
1470000	11
1480000	10
1490000	10
1500000	10
1510000	10
1520000	10
1530000	8
2250000	2
2260000	2
2270000	2
2280000	2
2290000	4
2300000	4
2310000	5
3370000	2
3380000	2
3390000	2
3400000	2
3410000	2
3420000	3
3430000	3
3440000	3
3450000	2

## Sheet: Inter-HostWindowsOverlapCulture
Window	Frequency
1440000	10
1450000	10
1460000	10
1470000	10
1480000	10
1490000	10
1500000	10
1510000	10
1520000	10
1530000	10
2220000	2
2230000	2
2240000	2
2250000	2
2260000	2
2270000	2
2280000	2
2290000	6
2300000	7
2310000	7
2320000	2
2330000	2
2590000	5
2600000	5
2610000	5
2620000	5
2630000	5
2640000	5
2650000	5
2660000	5
2670000	5
2680000	4
3800000	4
3810000	2
3880000	2
3890000	4
